# Supplementary material for: On the Relationship between Teleconnections and Taiwan's Streamflow: Evidence of Climate Regime Shift and Implications for Seasonal Forecasting
Source: Copernicus journal article supplement (doi:10.5194/hess-2016-216), 2016-06-15
Supplement: Supplementary file [file hess-2016-216-AC1-supplement.pdf]

***Interactive comment on “On the Relationship between Teleconnections and Taiwan’s Streamflow: Evidence of Climate Regime Shift and Implications for Seasonal Forecasting” by Chia-Jeng Chen and Tsung-Yu Lee***

**Anonymous Referee #1**

Received and published: 15 July 2016

This paper presents an analysis of correlations between large-scale climate indices and streamflow in 41 Taiwanese catchments. Additionally, a climate regime shift (CRS) analysis is employed to detect changes in the relationships between the climate indices and streamflow across time. Comments are made about the impact of CRS on predictor screening routines and forecasting.

The purpose of the paper is to identify the relationships between climate patterns and Taiwanese high season (July-August-September) streamflow. My understanding of the key findings suggested by the authors are: concurrent JAS correlations are positive and high for West-Pacific, Pacific-Japan and NAO indices; 9-month averaged preceding climate indices (ONDJFMAMJ) are generally more weakly correlated with JAS streamflow with the exception of the QBO which is negatively and significantly correlated; and climate regime shifts occurred in the 1970s and 1990s.

I suspect the study will not vastly benefit the general seasonal streamflow forecasting community, however it could be of interest in the study region. The writing is not yet publication quality, there is not enough detail for the study to be repeatable, and some choices related to data prevent this study from being clear cut with robust conclusions. My overall opinion is the paper is not coherent enough to be published in HESS at this time. However, I do encourage the authors to rethink certain aspects of the study and seek eventual publication. My general and specific comments are below.

We thank the reviewer for making a considerable effort to review our manuscript and provide insightful comments. As addressed by the reviewer, we do believe that the results of our correlation analysis is of great importance to Taiwan and most East Asian regions sharing similar climatic conditions; however, we also believe that the discussion part of our study (i.e., effect of CRS on predictor screening in general) should deserve more attention in the forecasting community, especially for those applying empirical forecasting methods. To address your foremost concerns, we would like to make the following statements at the front of our point-by-point responses:

- a) Regarding the reproducibility of this study (details of the data and methodology used, in line with Comment 3): We have listed all the periods of streamflow data used for the 41 gauges in Taiwan. Assumptions and limitations of the correlation analysis will be amply discussed, and so will the robustness of the CRS detection method. Related discussion can be found in our response to Comment 3 below.
  
- b) Regarding the inconsistent correlation analysis related to the Pacific-Japan (PJ) index (in line with Comment 2): We have consulted with Dr. Hisayuki Kubota from the Japan Agency for Marine-Earth Science and Technology, who developed the PJ index in his journal paper, to obtain the raw pressure data at Yokohama and Hengchun for the derivation of the new PJ index in JAS. The concurrent correlation analysis of the new PJ index is now consistent with all other indices, and our major findings stay very much the same, as expected. Furthermore, we have also derived the PJ index in three preceding seasons (i.e., AMJ, JFM, and previous OND) for conducting more lagged correlation analyses (in line with Comment 4). Please see our responses to Comments 2 and 4 below for more details.

We will carefully revise our article to your satisfactory level. We wish our revision will find your support of our article.

### General comments

1) The stated purpose of this paper is to understand climate impacts on seasonal streamflow forecasting (as per the title) in Taiwan. Of concern is empirical prediction (P11 L5-6). P5 L22-23 states that lagged correlations are used to investigate forecasting possibilities. What is not made sufficiently clear is why the concurrent analysis of climate indices and streamflow is included in this study. To make use of concurrent relationships, models would need to be used to forecast the climate indices in the first instance. I suggest clarifying the reasoning and reconsider the weight given to the concurrent results in the paper unless knowing concurrent relationships is actually useful for empirical seasonal streamflow forecasting in Taiwan. Furthermore, the results and discussion interweave concurrent results and suggestions about the implications for forecasting in a way which I interpret as incompatible.

We agree with the reviewer that the concurrent analysis does not produce immediate forecasting utility. However, we believe that it is still important to examine concurrent relationships between climate indices and streamflow since many climate patterns have been proven to drive regional climates in the concurrent season. Probably the idea of calculating contemporaneous/concurrent correlations was best demonstrated by Wallace and Gutzler (1981), who nicely described several dominant teleconnection patterns at the Northern

Hemisphere extratropics during winter (e.g., NAO). Beyond the Northern Hemisphere extratropics, one of the most important concurrent relationships being witnessed by several operating agencies and research organizations (e.g., CPC and IRI) is the impacts of ENSO on world regions. Various maps of the concurrent relationships (e.g., composite and historical probability) have been archived as valuable references. Over the Indian Ocean basin, the different phases of the IOD are also known to have pronounced concurrent impacts on the formation of the trade wind and the short rains over East Africa from October to November (Black et al., 2003; Clark et al., 2003; Behera et al., 2005; Chen and Georgakakos, 2015). By contrast, significant lagged correlations (if identified) can indeed generate some forecasting utility, but to assess the dynamical mechanisms of the lagged relationships found by statistical approaches is usually not a trivial task. To use concurrent relationships for forecasting, one can adopt a hierarchical or hybrid approach that applies another empirical or dynamical model to forecast the climate indices in the first instance (e.g., Kim and Webster, 2010; also suggested by the reviewer).

The above clarification will be incorporated into the revised article.

In addition, we wish to restate the original scope of this work, which was set to focus more on the discussion about the general relationships between teleconnections and Taiwan's streamflow, rather than the development of a prediction model for the pursuit of forecasting utility. This article is currently included in the special issue of *sub-seasonal to seasonal hydrological forecasting* (as per the editor's suggestion), but we do not want to mislead the reviewer about our original intent. Since we have agreed with the transfer decision of our manuscript, we certainly realize it should be our responsibility to include more forecasting elements in the study. In essence, we have conducted more lagged correlation analyses as suggested by the reviewer in Comment 4 below. This part of results will be included in the revised article to provide a more balanced weight between the concurrent and lagged results.

2) A different point, but related to the above. It severely bothers me that the Pacific Japan (PJ) correlations are different to all the others in that they are "semi-concurrent" (P5 L30-32) and not consistent with the separate concurrent and lagged analyses. The JJA PJ index is treated as concurrent for JAS, which in my mind is technically incorrect, and concerning given the PJ results feature so heavily in the paper. The CRS analysis and discussion, as far as I can tell, hinges on the PJ index (Table 2 and P8 L24-27). It seems to me an effort has been made to include the PJ index because it yields high correlations (Fig 4) and garners some significant CRS results when really it should be excluded or included in a way that is consistent with the other results. Can the authors obtain the full PJ time series and complete the analysis more rigorously and put the PJ correlation and CRS analyses in the context of forecasting?

We think it would be worthwhile to provide the context of how we chose to use the PJ index. Kubota et al. (2015) developed the PJ index to monitor the long-term interannual variability of the PJ pattern (leading mode over the western North Pacific during summer), and they used JJA (typical definition of boreal summer) for the average period. It was unfortunate that they did not generate JAS or monthly PJ index for our purpose, so we ended up using their JJA index with an annotation (i.e., “semi-concurrent”) added to the manuscript. Since the PJ pattern has been proven to dominate cyclonic activity and summer rainfall in East and Southeast Asia, it was our gut feeling that high correlations between the PJ index and Taiwan’s streamflow should be observed as well. This supposition was then supported by our experiment, and then the intriguing CRS was identified. We believed the significant correlation and CRS results should outweigh the slight inconsistency with other indices, so we presented our findings as is without pursuing the absolute consistency.

Nevertheless, we agree that the PJ-related presentation is somewhat distinct from all other analyses, so we have managed to develop the new PJ index using the following steps (with Dr. Kubota’s guidance):

- a) We first obtained atmospheric pressure data at Yokohama and Hengchun in Japan and Taiwan, respectively.
- b) We calculated the JAS (and all other tri-monthly periods, e.g., AMJ, JFM, and previous OND) average of atmospheric pressure anomaly, and then normalized the values by the standard deviation at each station.
- c) The JAS (and all other tri-monthly periods) PJ index was derived from the difference of the two normalized pressure anomalies, and then the index was normalized again by its 1979–2009 standard deviation.

We have successfully reproduced the JJA PJ index and produced the new JAS PJ index. The figure below shows the comparison between the PJ index in JAS and that in JJA. The correlation analysis can now be performed with full consistency, and the results will be updated in the revised article (demonstrated by the table below). In terms of concurrent correlations, the updated results seem to be *even more significant* than the original ones.

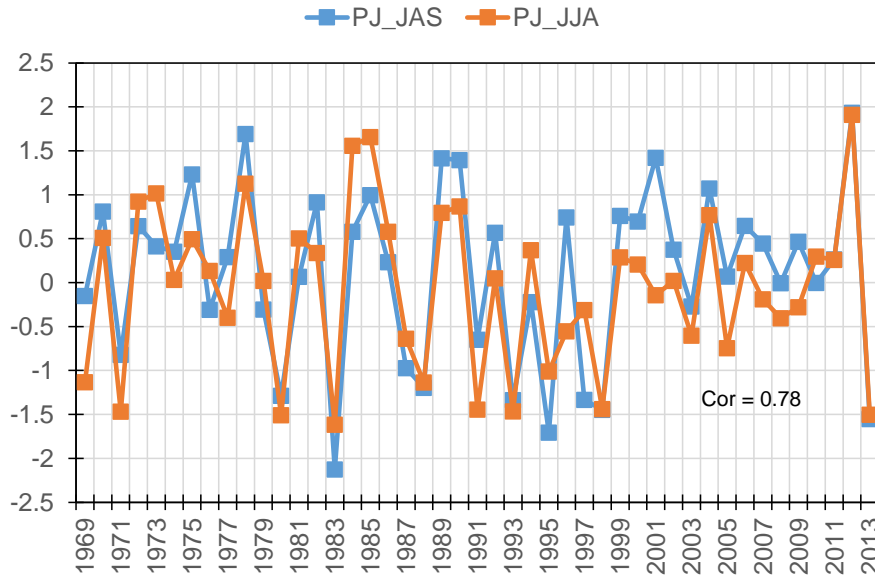

**Figure R1.** Comparison between the PJ index in JAS and that in JJA.

**Table R1.** Comparison between the correlation values derived from JAS\_PJ and those from JJA\_PJ (original results in Table 2 of the manuscript); values before (after) the slash are concurrent (lagged) correlation coefficients ( $\times 10^{-2}$ , significant at  $p = 0.05$  are bold and italic)

| JAS Runoff<br>Watershed | Climate Index |             |
|-------------------------|---------------|-------------|
|                         | JAS_PJ        | JJA_PJ†     |
| TC                      | <b>33/-8</b>  | <b>25/*</b> |
| HLO                     | <b>45/21</b>  | <b>32/*</b> |
| WU                      | <b>26/12</b>  | <b>45/*</b> |
| JS                      | <b>40/34</b>  | <b>33/*</b> |
| BG                      | 13/8          | <b>26/*</b> |
| ZW                      | 25/12         | <b>16/*</b> |
| ER                      | 12/3          | <b>5/*</b>  |
| GP                      | <b>34/3</b>   | <b>30/*</b> |
| BN                      | <b>25/-9</b>  | <b>9/*</b>  |
| SGL                     | <b>40/11</b>  | <b>41/*</b> |
| HLI                     | <b>38/13</b>  | <b>20/*</b> |
| HP                      | 17/-2         | <b>7/*</b>  |
| LY                      | <b>31/-8</b>  | <b>9/*</b>  |

†: lagged correlation was not computed for the original results

3) The manuscript is far too scant in the detail of the data and the methodology for it to be repeatable. Questions I have are: a) What is the period of data used? P4 L16 states that an “extended record” is selected. Exactly what is the period of data for each gauge? Are they all the same or different? b) What are the assumptions of the correlation analysis? What are its limitations and how is it suitable for this analysis? c) Is the CRS detection method robust for picking out multiple change points in short data records?

Please see our point-by-point responses to your specific questions:

- a) Regarding the period of data: The periods of record for all 41 catchments are listed in the table below (which will be included in the revised article). Despite the existence of CRS, correlation analysis typically requires a sufficiently long period of record. Thus, we decided to use all available data even though their periods of record are not entirely the same.

**Table R2.** Period of data record and missing data percentage for all 41 catchments used for our analysis. Note that we use only JAS data in each year, and the missing data percentage is referred to as the percentage of years in which no JAS data is available.

| Catchment (downstream) | Period of Record | Missing Data % | Catchment (upstream) | Period of Record | Missing Data % | Catchment (upstream) | Period of Record | Missing Data % |
|------------------------|------------------|----------------|----------------------|------------------|----------------|----------------------|------------------|----------------|
| TC                     | 1951–2013        | 0%             | Cat_01               | 1970–2013        | 2.3%           | Cat_15               | 1970–2013        | 2.3%           |
| HLO                    | 1981–2013        | 0%             | Cat_02               | 1970–2006        | 0%             | Cat_16               | 1971–2013        | 0%             |
| WU                     | 1966–2013        | 2.1%           | Cat_03               | 1970–2002        | 0%             | Cat_17               | 1970–2013        | 11.4%          |
| JS                     | 1965–2009        | 0%             | Cat_04               | 1970–2002        | 0%             | Cat_18               | 1971–2013        | 2.3%           |
| BG                     | 1949–2013        | 0%             | Cat_05               | 1971–2007        | 0%             | Cat_19               | 1970–2013        | 11.4%          |
| ZW                     | 1960–2013        | 0%             | Cat_06               | 1972–2013        | 2.4%           | Cat_20               | 1970–2013        | 11.4%          |
| ER                     | 1971–2013        | 0%             | Cat_07               | 1970–2008        | 0%             | Cat_21               | 1970–2013        | 11.4%          |
| GP                     | 1951–2010        | 0%             | Cat_08               | 1976–2013        | 5.3%           | Cat_22               | 1970–2001        | 0%             |
| BN                     | 1948–2013        | 4.5%           | Cat_09               | 1972–2013        | 0%             | Cat_23               | 1974–2013        | 5%             |
| SGL                    | 1969–2013        | 0%             | Cat_10               | 1970–2013        | 0%             | Cat_24               | 1977–2011        | 5.7%           |
| HLI                    | 1969–2013        | 0%             | Cat_11               | 1970–2013        | 2.3%           | Cat_25               | 1977–2011        | 2.9%           |
| HP                     | 1975–2013        | 5.1%           | Cat_12               | 1970–2008        | 0%             | Cat_26               | 1970–2012        | 2.3%           |
| LY                     | 1949–2009        | 0%             | Cat_13               | 1970–2013        | 9.1%           | Cat_27               | 1970–2013        | 0%             |
|                        |                  |                | Cat_14               | 1970–2013        | 4.5%           | Cat_28               | 1970–2013        | 2.3%           |

- b) Regarding the assumptions and limitations of the correlation analysis: One of the most fundamental assumptions of the correlation analysis would be the result of such analysis does not indicate any causality. The result can be two-way; that is, there is no physical implication for a predictor-predictand relationship. However, the assumption taken by us is that significant correlations should suggest some large-scale dominance over local-scale hydroclimate since the opposite route of dominance (i.e., the impact of a disturbance at the island (Taiwan) scale on large-scale circulations) is unlikely and hard to explain. In addition, we also neglect the effect of any outliers (if exist) and examine only the linear relationship between two continuous variables. In other words, our analysis cannot identify any nonlinear effect of extreme teleconnection patterns on Taiwan's streamflow.

c) Regarding any caveats of using the CRS detection method (number of change points vs. data length): As already indicated by the manuscript, there are several classes of approaches available for the detection of regime shifts, such as parametric methods (e.g., the classical  $t$ -test), non-parametric methods (e.g., the Mann-Whitney-Pettitt test), regression-based methods, cumulative sum methods, and sequential methods. Rodionov (2005) pointed out the pros and cons of some common approaches as well as his sequential method (Rodionov, 2004). The pros of his method are the automatic, early detection of a regime shift and the ability to monitor a possibility of a regime shift in real time. He has shown that his method can outperform Lanzante's method (another robust, non-parametric procedure developed by Lanzante, 1996). Therefore, since developed, Rodionov's method has been used in many studies in climate sciences. Nevertheless, the cons of his method are the requirement of some experimentation on the two parameters used (i.e., the cut-off length  $l$  and probability level  $p$ ) and inability to account for a gradual regime shift and data with obvious autocorrelation (or red noise, but this issue was later ameliorated by a prewhitening procedure introduced by him, Rodionov, 2006). According to Rodionov (2004), while the probability level  $p$  is known to determine the critical value of  $t$  (the Student's  $t$ -distribution), *"the cut-off length  $l$  determines the minimum length of the regimes, for which the magnitude of the shifts remains intact."* It has been tested that, the larger  $l$  is set, the fewer change points can be identified. By contrast, a smaller  $l$  does not necessarily lead to more change points since only those significant change points can be identified based on the  $t$ -test. In other words, if there is no strong regime shift in the data series, the method with some variations in  $p$  and  $l$  simply cannot identify any change point (Rodionov, 2015 and verified by us too). In any case, we should still use Rodionov's method with caution since the CRS detection method is purely statistical, and the CRS results could be meaningless without solid evidence from related research.

We will incorporate the above discussions into the revised article.

4) For me it would be far more interesting to analyse lagged correlations with increasing lead time as suggested at P5 L28-30, rather than averaging climate indices over the preceding three-, six- and nine-month periods and then presenting the best results. For forecasting, some of the indices are not immediately available after the end of June. E.g. at 15 July 2016, the PDO index for June is not yet published at [jisao.washington.edu](http://jisao.washington.edu)

We have been aware of the reviewer's (and likely other readers') interest in seeing more results of lagged correlations. Thus, for all 41 catchments, we have calculated two additional sets of lagged correlations between the JAS flow data

and the climate indices averaged over two preceding periods (ONDJFM and OND), in line with our average scheme used in the article. The table below shows the new generated results of lagged correlations for the major watersheds in Taiwan; the complete results will be included in the revised article.



**Table R3.** Results of correlation analysis for the major watersheds in Taiwan; values before (after) the slash are lagged correlation coefficients with preceding ONDJFM (OND) climate indices ( $\times 10^{-2}$ , significant at  $p = 0.05$  are bold and italic).

| JAS<br>Runoff | Climate Index |         |                 |                |         |         |         |         |                |             |       |                |         |              |
|---------------|---------------|---------|-----------------|----------------|---------|---------|---------|---------|----------------|-------------|-------|----------------|---------|--------------|
|               | AMO           | PDO     | NINO1+2         | NINO3.4        | NINO4   | IOD     | EPNP    | PNA     | AO             | AAO         | NAO   | QBO            | WP      | PJ           |
| TC            | 4/5           | 4/7     | -13/-14         | -13/-14        | -1/-1   | -10/-14 | -1/12   | -9/-9   | -6/-1          | 12/0        | 1/6   | -20/-19        | -14/-9  | -11/-2       |
| HLO           | 27/29         | -14/-10 | -32/-29         | -24/-23        | -12/-10 | -3/-5   | -27/-10 | -11/0   | -5/4           | 4/-15       | 2/12  | <b>-42/-43</b> | -4/0    | 21/20        |
| WU            | -22/-19       | 0/7     | -18/-17         | -14/-17        | -11/-18 | -14/-24 | -4/1    | -11/-2  | 7/8            | 6/-6        | 14/14 | -1/3           | -4/-3   | 10/4         |
| JS            | 8/15          | -16/-9  | <b>-28/-29</b>  | <b>-32/-31</b> | -26/-26 | -13/-19 | -26/-11 | -15/8   | 8/12           | <b>30/8</b> | 8/21  | -21/-17        | 9/6     | <b>43/34</b> |
| BG            | -6/-7         | 5/12    | -12/-12         | -12/-10        | -18/-18 | -7/-14  | -2/18   | 2/9     | <b>-28/-13</b> | -9/-21      | -4/12 | -20/-17        | -1/-10  | 1/16         |
| ZW            | 4/8           | -26/-19 | -25/- <b>28</b> | -22/-21        | -19/-17 | -12/-14 | -20/-8  | -16/-3  | 4/2            | 12/-11      | -5/3  | <b>-28/-26</b> | 0/-9    | 21/23        |
| ER            | 16/18         | -10/-7  | -16/-10         | -15/-13        | -11/-8  | -7/-13  | -14/0   | -5/0    | -1/-7          | 22/5        | 0/0   | 3/9            | 8/4     | 21/21        |
| GP            | 1/6           | -9/0    | -20/-21         | -21/-19        | -17/-17 | -9/-19  | -4/10   | -13/-5  | 5/2            | <b>28/6</b> | 3/9   | -20/-17        | 10/5    | 13/19        |
| BN            | <b>16/25</b>  | -22/-24 | <b>-25/-26</b>  | -15/-17        | -9/-12  | 8/-5    | 2/-9    | -15/-20 | -13/-11        | 24/5        | 3/-7  | -9/-7          | -11/-15 | -7/-5        |
| SGL           | -5/-3         | 4/5     | -16/-7          | -8/-8          | -2/-1   | -4/2    | -11/-5  | -11/-8  | 0/-2           | 21/16       | 6/8   | <b>-31/-24</b> | -8/-20  | 9/-7         |
| HLI           | 21/21         | -17/-16 | -22/-18         | -9/-7          | 1/2     | -2/0    | -26/-14 | -15/-3  | -12/-8         | 17/0        | -12/3 | <b>-34/-29</b> | 8/-13   | 20/9         |
| HP            | 13/14         | 1/8     | -7/-4           | 3/5            | 12/13   | 7/9     | -1/13   | -20/-23 | 5/-1           | -6/10       | -6/-1 | -28/-22        | -13/-30 | 11/1         |
| LY            | 18/18         | -5/-5   | -11/-15         | -12/-14        | -5/-3   | 6/-5    | 7/6     | -4/-7   | -17/-17        | -1/-11      | 6/-5  | <b>-33/-25</b> | 1/-2    | 4/8          |

## Specific comments

5) Related to major comment 3, I suspect the QBO can have a strange distribution. Given it has the most outstanding lagged correlation (overall correlation actually) and the concluding remarks section trumpets its forecasting potential (P11 L10), this should be analysed further. It would be helpful to confirm that the results are not a quirk.

First of all, the QBO depicts a quasi-periodic oscillation between easterlies (positive) and westerlies (negative phase) over the lower tropical stratosphere, and the period is about 20 to 36 months. This information, as per the other reviewer's suggestion, will be added to Section 2.1 in the revised article.

In order to confirm that the most outstanding lagged correlation between Taiwan's streamflow and the QBO, additional literature review and field significance test are conducted. The strongest lagged correlation is very likely attributed to the tropical cyclone (TC) activity in the western North Pacific (WNP) modulated by the QBO. Chan (1995) has performed a cross-spectral analysis between the QBO and the number of TCs in the WNP and indicated that the leading westerly phase of the QBO can result in an increase in TC activity. He explained that the westerly phase of the QBO creates an environment of relatively low vertical wind shear in favor of TC formation. Ho et al. (2009) later found that during the westerly (easterly) phase of the QBO, more TCs approaches the East China Sea (the eastern shore of Japan). Therefore, the negative correlation between the QBO index and TC activity in the vicinity of Taiwan is carried over into the negative correlation with streamflow. In fact, such strong correlations found in 22 out of the 41 catchments also reach field significance. The number of catchments with significant temporal correlations has exceeded the critical value of field significance ( $p = 0.05$ ) from the empirical null distribution (Figure R2) developed by using a Monte Carlo technique similar to those suggested by Livezey and Chen (1983) and Wilks (2011). 2000 Monte Carlo trials are used, and each trial depicts a significant local test for correlations between the "randomly ordered" QBO index and streamflow data at the 41 catchments, resulting a count of the number of catchments with significant temporal correlations constituting the null distribution.

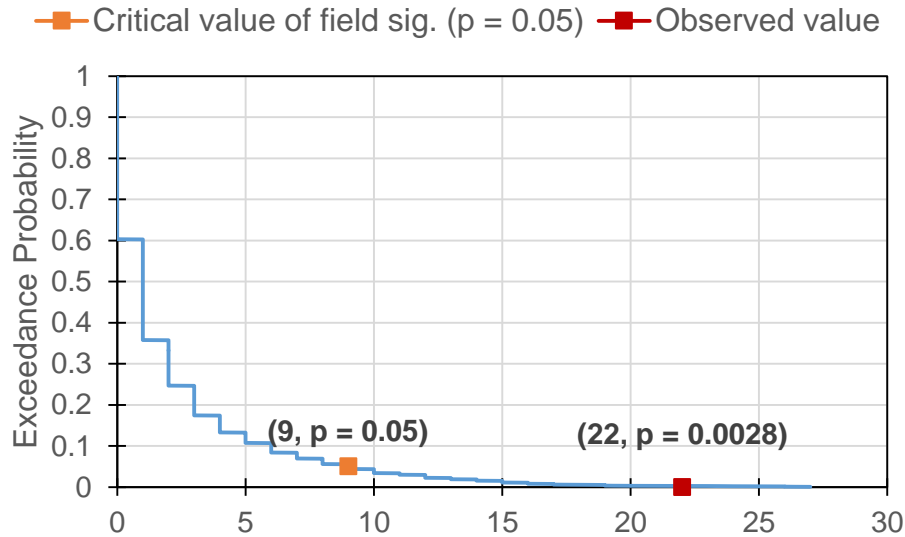

**Figure R2.** Empirical null distribution of field significance test. The abscissa represents the number of catchments with correlations between streamflow and lagged QBO significant at the 95% level ( $p = 0.05$ ) in 2000 Monte Carlo trials.

6) In the abstract and elsewhere it is mentioned that the lagged correlations represent 1 month lead time. From my experience, the lagged correlations would be called 0 months lead time, since data up until the end of June is used.

You are correct, but to avoid any confusion with the concurrent analysis, we will replace those lead time information with the exact average period. For example, we will make the following change in the abstract (original manuscript P1L8):

*“On the other hand, the Quasi-Biennial Oscillation index averaged over a period from previous October to concurrent June significantly correlate with the JAS flows (most significant  $r = -0.66$ ), indicating some forecasting utility.”*

7) Should the RHS of equation (3) be  $2(1-r)$ ?

Sorry for the typo, and yes, it should be  $2(1-r)$ .

8) P6 L10 – not sure that it is correct to say  $x = y = 0$  if the variables are normalized. The variance analysis doesn't appear to depend on this anyway.

We agree that “normalization” is a term with a more rigorous definition, so we will revise the sentence as:

*“Further, if the two variables have zero mean and unit variance, the above equation...”*

9) Is it possible to mark significance thresholds on Figure 4? I understand it may not be possible if the data records have different lengths.

As indicated by the reviewer, since the data records have different lengths, it is not possible to mark significance thresholds on Figure 4.

10) I may have missed the reasoning, but I don't understand why the pink and blue lines in Figure 5 start at different points.

Same reason above, since the data records have different lengths and start at different years, the pink and blue lines in Figure 5 start at different points. We will make this remark in the revised article.

#### Technical corrections (typing errors, etc.)

11) Some captions are far too brief, e.g. Figure 5.

Agreed. We will add more descriptions to those short captions. For instance, the caption of Figure 5 will be revised as:

*“**Figure 5.** Selected moving-window correlation results. Each boxplot encapsulates correlation values derived from 28 upstream catchments (JAS runoff vs. specific climate index). Blue (magenta) time series denotes the highest (lowest) moving-window correlations over the temporal horizon. Please refer to Section 3.2 for more details.”*

12) P7 L10: I suspect this should be \*any\* rather than \*none\*.

Agreed. We will change to “any.”

#### **References**

Behera SK, Luo JJ, Masson S, Delecluse P, Gualdi S, Navarra A, Yamagata T. 2005. Paramount impact of the Indian Ocean dipole on the East African short rains: A CGCM study. *J. Clim.* 18: 4514–4530.

Black E, Slingo J, Sperber KR. 2003. An observational study of the relationship between excessively strong short rains in coastal East Africa and Indian Ocean SST. *Mon. Weather Rev.* 131: 74–94.

Chan, J.C., 1995. Tropical cyclone activity in the western North Pacific in relation to the stratospheric quasi-biennial oscillation. *Monthly Weather Review*, 123(8), pp.2567-2571.

Clark CO, Webster PJ, Cole JE. 2003. Interdecadal variability of the relationship between the Indian Ocean zonal mode and East African coastal rainfall anomalies. *J. Clim.* 16: 548–554.

Ho, C.H., Kim, H.S., Jeong, J.H. and Son, S.W., 2009. Influence of stratospheric quasi-biennial oscillation on tropical cyclone tracks in the western North Pacific. *Geophysical Research Letters*, 36(6).

Kim, H.M. and Webster, P.J., 2010. Extended-range seasonal hurricane forecasts for the North Atlantic with a hybrid dynamical-statistical model. *Geophysical Research Letters*, 37(21).

Lanzante, J.R., 1996. Resistant, robust and non-parametric techniques for the analysis of climate data: Theory and examples, including applications to historical radiosonde station data. *International Journal of Climatology*, 16(11), pp.1197-1226.

Livezey, R.E. and Chen, W.Y., 1983. Statistical field significance and its determination by Monte Carlo techniques. *Monthly Weather Review*, 111(1), pp.46-59.

Rodionov, S.N., 2005. A brief overview of the regime shift detection methods. *Large-Scale Disturbances (Regime Shifts) and Recovery in Aquatic Ecosystems: Challenges for Management Toward Sustainability*, pp.17-24.

Rodionov, S.N., 2006. Use of prewhitening in climate regime shift detection. *Geophysical Research Letters*, 33(12).

Wilks, D.S., 2011. *Statistical methods in the atmospheric sciences* (Vol. 100). Academic press.
